## Reviews.

**H. U. Sverdrup.** "On the vertical circulation in the Ocean due to the action of the wind with application to conditions within the Antarctic circumpolar current". Discovery Repts. Vol. VII, pp. 139—170. Cambridge, 1933.

Ausgehend von der Frage nach dem Anteil des Windes und der Dichteunterschiede an den Meeresströmungen gibt der Verfasser zunächst einen Überblick über die von V. W. Ekman entwickelten Grundsätze über die windbedingten Meeresströme: den reinen Triftstrom, den Gradient- und den Bodenstrom in homogenem, sowie den Konvektionsstrom in unhomogenem Wasser. Auf Grund theoretischer Überlegungen kommt er zu dem Resultat, dass ein stationärer Strom in einem Kanal, der in Ost—West-Richtung um die Erde läuft, wie zum Beispiel in dem antarktischen Wasserring, nur in Abwesenheit des "slope current" — des Gradientstromes — existieren kann. Nach Sverdrup sind also an der Ausbildung vertikaler Zirkulationen ebenso der *Wind* wie auch die anderen die Dichte direkt beeinflussenden Faktoren, wie Verdunstung und Niederschlag beteiligt.

An der Afrikanischen und Amerikanischen Westküste ist dieser Einfluss des Windes auf den vertikalen Aufbau bekannt. Ein weiteres Beispiel hierfür sind die Verhältnisse an der Antarktischen Konvergenz. Sie liegt im Atlantischen Ozean auf ca. 50° S. Br. und geht in der Drake-Strasse bzw. im Pazifischen Ozean, wie die Discovery Schnitte I—VI zeigen, bis auf 60° nach Süden. Ihre Entstehung wird auf Unterschiede der Windstärke südlich und nördlich dieser Grenzlinie zurückgeführt. Die stärkeren Westwinde im Süden bedingen auch einen stärkeren nach Norden gerichteten Triftstrom, der mit dem schwächeren im Norden konvergiert. Für diesen Strom, der durch das vom Antarktischen Kontinent hinwegsetzende Schmelzwasser noch verstärkt wird, muss Kompensation vorhanden sein. Dieser Ersatz geht nun, wie die zwischen 30 und 75° W. gelegenen Schnitte zeigen, zum Teil in einer Tiefe zwischen 900 bis 500 m. mittels aus dem antarktischen Zwischenstrom abkurvender Stromfäden vor sich. Er bildet in dem an der Polarfront (antarkt. Konvergenz) absinkenden Antarktischen Zwischenstrom bei Betrachtung von Westen her eine entgegengesetzt dem Uhrzeiger verlaufende Vertikalzirkulation, die besonders in den Temperaturschnitten gut erkennbar wird. Das von Merz-Wüst aufgestellte Zirkulationsschema, das hier im Süden nur drei Stockwerke vorsah — nämlich den antarktischen Zwischenstrom, den nordatlantischen Tiefenstrom, sowie den antarktischen Bodenstrom — muss demnach um ein neues Glied, den "Intermediate return current", bereichert werden. Die Geschwindigkeit des nordwärts gerichteten

Antarktischen Wassers wird zu 4.5 cm./sec., die des Return Current zu 0.5 cm./sec. berechnet. Dieses ganze System wird überlagert durch die allgemeine Ost-Strömung. Sie bedingt, dass die Strombahnen der Wasserteilchen komplizierte räumliche Spiralen werden.

Es ist nur zu wünschen, dass die vom Verfasser in dieser anregungsreichen Arbeit abgeleiteten und als hypothetisch bezeichneten Ergebnisse durch weitere Untersuchungen bestätigt werden. Besondere Aufmerksamkeit wäre hierbei auf die von Cl o w e s aufgestellte Behauptung zu richten, der sich S v e r d r u p anschliesst, dass das Tiefenwasser im Westen des Südatlantischen Ozeans aus dem Pazifischen Ozean stammt.

G. B.

**G. E. R. Deacon.** "A general account of the hydrology of the South Atlantic Ocean." Discovery Repts. Vol. VII, pp. 171—238. Cambridge, 1933.

An der Hand von 2 Schnitten der "Discovery" in der Scotia See zwischen 75° und 80° W., sowie einem längeren Schnitt im Südatlantischen Ozean auf 30° W. gibt der Verfasser eine allgemeine hydrographische Übersicht über den Südatlantischen bzw. Süd-Pazifischen Ozean, die als Grundlage für den Biologen dienen soll.

Im ersten Abschnitt werden die oberflächennahen Schichten behandelt, die in Antarktisches, Subantarktisches, Tropisches und Subtropisches Wasser gegliedert werden. Das Antarktische Wasser besitzt eine Dicke, die von Süden nach Norden, also in seiner Bewegungsrichtung von 100 auf 250 m. zunimmt und hat bei einer Temperatur von ca. 1.6° einen Salzgehalt von 33 bis 34 ‰. Wie Vertikalkurven einzelner Stationen zu verschiedenen Jahreszeiten in der Nähe Südgeorgiens zeigen, steigt die Temperatur im Sommer bis auf 2.5°. In 150 m. Tiefe beträgt die Jahresschwankung der Temperatur noch ca. 1° und die des Salzgehaltes 0.1 ‰. Jahreskurven geben die Eintrittszeit des Temperaturmaximums im Februar—März, die des Minimums im August an. Für die Salzgehaltsextreme ergeben sich bis 100 m. ungefähr die gleichen Eintrittszeiten; in 150 m. wechselt jedoch die Phase, das Maximum fällt hier auf September, das Minimum auf den März.

Horizontalschnitte für Temperatur, Salzgehalt und Sauerstoff erläutern die Zirkulation, die für die Weddell-See im wesentlichen das von H. H. F. Meyer festgestellte Strombild, nämlich einen *cum sole* drehenden Wirbel, bestätigt. In seiner Mitte zeigt der geringe Sauerstoffgehalt eine Hebung tieferer Schichten an; ebenso ist an der Westküste von Grahamland und im Bransfield Sund offenbar Auftriebwasser (76 ‰ O<sub>2</sub>) vorhanden. Eine Abweichung von Meyer findet sich jedoch in der Lage der Nordgrenze des Antarktischen Wassers, der Antarktischen Konvergenz, die nicht im Atlantischen auf 50° S. Br. in ca. 45° W. zerflattert, bzw. als Nordgrenze der Falklandstromes fortgesetzt wird, sondern sich durch die Mitte der Drake Strasse nach SW. bis auf 60° S. hinzieht.

Zwischen dieser Antarktischen und der Subtropischen Konvergenz, die auf ca. 40° S. Br. angenommen wird, liegt das Subantarktische Wasser, dessen Temperatur von Süd nach Nord an der Oberfläche im Mittel von 5 auf 13° ansteigt, während der Salzgehalt von 34.0 auf 34.4 ‰ zunimmt. Das Temperatur-Maximum an der Oberfläche wird mit 6.9° Ende Februar, das Minimum mit 3.5° im September erreicht. In 400 m. verschiebt sich die Phase um 2 Monate; die Jahresschwankung beträgt nur noch 1°. Im Salzgehalt fallen die Extreme auf April—Mai (Min.) und November (Max.).
